# Supplementary material for: Outbreak of Hyposidra talaca Walker (Lepidoptera: Geometridae) as a new sporadic pest of mango in northern India: Insights from morphological, molecular, and ecological studies
Source: Research Square preprint supplement (doi:10.21203/rs.3.rs-6807532/v1), 2025-06-13
Supplement: Supplementary file 1 [file bde76b7debb844e22c2f2959.docx]

**Supplementary Table 1. Library details** **indicating the BLAST results for the matching sequences; Molecule Type: DNA; Database Name: nt/nr Description: Nucleotide collection (nt) (Program: BLASTN 2.2.28+)**

| Description | Max Score | Total Score | Query Cover | E value | Per. ident | Accession |
| --- | --- | --- | --- | --- | --- | --- |
| *Hyposidra talaca* voucher CISH-PP-12 cytochrome c oxidase subunit I (COX1) gene, partial cds; mitochondrial | 878 | 878 | 100% | 0 | 99.79 | [PV037431.1](https://www.ncbi.nlm.nih.gov/nucleotide/PV037431.1?report=genbank&log$=nucltop&blast_rank=1&RID=WJFDCBEM013) |
| *Hyposidra talaca* voucher TSL0Z14 cytochrome oxidase subunit 1 (CO1) gene, partial cds; mitochondrial | 878 | 878 | 100% | 0 | 99.79 | [MN198978.1](https://www.ncbi.nlm.nih.gov/nucleotide/MN198978.1?report=genbank&log$=nucltop&blast_rank=2&RID=WJFDCBEM013) |
| *Hyposidra talaca* voucher RMNH.INS.13989 cytochrome oxidase subunit 1 (COI) gene, partial cds; mitochondrial | 872 | 872 | 100% | 0 | 99.58 | [GU662861.1](https://www.ncbi.nlm.nih.gov/nucleotide/GU662861.1?report=genbank&log$=nucltop&blast_rank=3&RID=WJFDCBEM013) |
| *Hyposidra talaca* voucher 11ANIC-04142 cytochrome oxidase subunit 1 (COI) gene, partial cds; mitochondrial | 817 | 817 | 100% | 0 | 97.49 | [JN267470.1](https://www.ncbi.nlm.nih.gov/nucleotide/JN267470.1?report=genbank&log$=nucltop&blast_rank=4&RID=WJFDCBEM013) |
| *Hyposidra janiaria* voucher 11ANIC-04155 cytochrome oxidase subunit 1 (COI) gene, partial cds; mitochondrial | 706 | 706 | 100% | 0 | 93.32 | [KF389809.1](https://www.ncbi.nlm.nih.gov/nucleotide/KF389809.1?report=genbank&log$=nucltop&blast_rank=5&RID=WJFDCBEM013) |
| *Hyposidra apioleuca* voucher BC ZSM Lep 36783 cytochrome oxidase subunit 1 (COI) gene, partial cds; mitochondrial | 678 | 678 | 100% | 0 | 92.28 | [HQ565947.1](https://www.ncbi.nlm.nih.gov/nucleotide/HQ565947.1?report=genbank&log$=nucltop&blast_rank=6&RID=WJFDCBEM013) |
| *Jankowskia athleta* mitochondrion, complete genome | 671 | 671 | 100% | 0 | 92.05 | [MN715148.1](https://www.ncbi.nlm.nih.gov/nucleotide/MN715148.1?report=genbank&log$=nucltop&blast_rank=7&RID=WJFDCBEM013) |
| *Arichanna perimelaina* voucher 17446 cytochrome oxidase subunit I (COI) gene, partial cds; mitochondrial | 660 | 660 | 100% | 0 | 91.63 | [KY391993.1](https://www.ncbi.nlm.nih.gov/nucleotide/KY391993.1?report=genbank&log$=nucltop&blast_rank=8&RID=WJFDCBEM013) |

**Following are the assembled contig for both samples**

ATTAATTGGAGATGATCAAATTTATAATACTATTGTTACTGCTCATGCCTTTATTATAATTTTTTTATAGTTATACCAATTATAATTGGTGGATTTGGAAATTGATTAGTACCATTAATATTAGGTGCTCCAGACATAGCCTTCCCACGAATAAATAATATAAGATTTTGACTTTTACCCCCATCAATTACCCTTTTAATTTCAAGCAGAATTGTAGAAAATGGGGCTGGAACTGGATGAACAGTCTATCCCCCTTTATCCTCTAATATTGCTCACGGAGGAAGATCTGTTGACTTAGCAATTTTTTCTTTACATTTAGCGGGAATTTCATCTATTCTAGGAGCAATTAATTTTATTACAACAATTATTAATATACGATTAAATAATTTATCATTCGACCAAATACCATTATTTGTGTGAGCTGTTGGAATTACAGCATTTTTACTGTTACTTTCATTACCTGTATTAGCTGGAGCTA

**
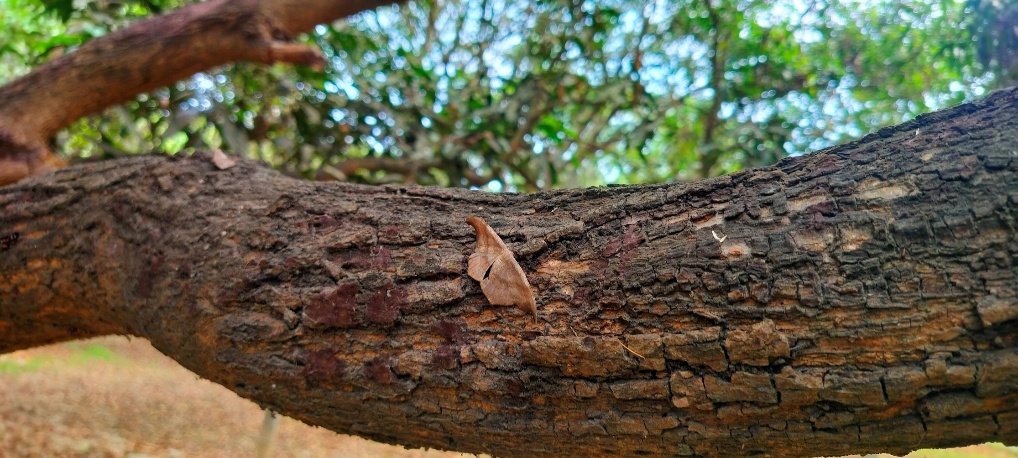
Supplementary Figure 1. Adult female and male on tree trunk**

1.
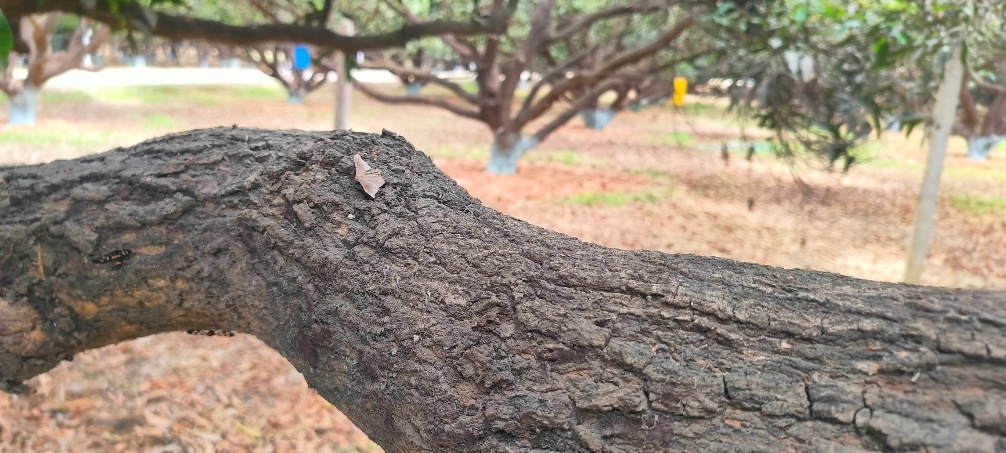
Adult female of *H. talaca*
2. Adult male of *H. talaca*
